# Supplementary material for: Identification and genetic characterization by high-throughput SNP analysis of intervarietal substitution lines of rapeseed (Brassica napus L.) with enhanced embryogenic potential
Source: Springer Nature journal article supplement (doi:10.1007/s00122-015-2455-7), 2015-01-27

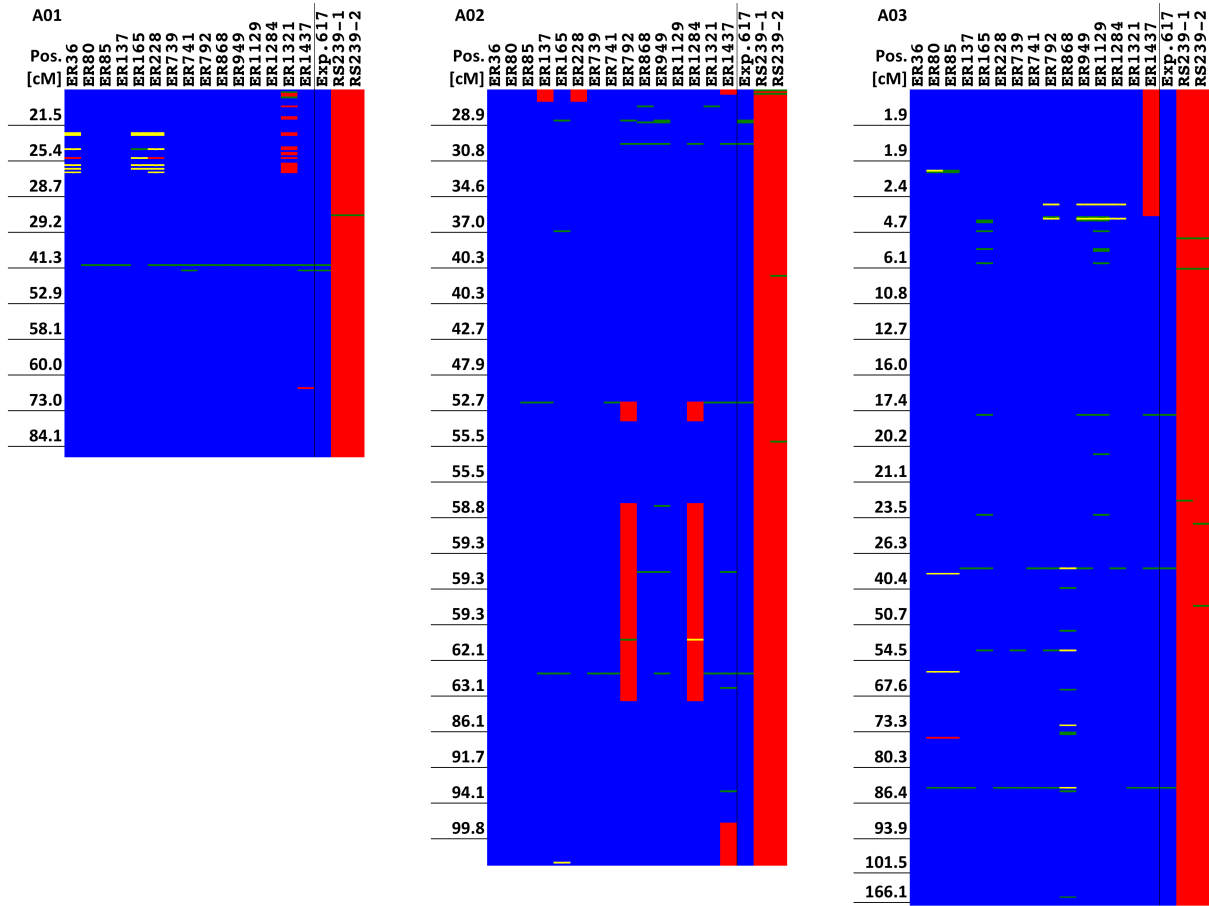

Figure S1: Overview of donor segments and marker scorings in the selected ISLs and the parents on the linkage groups of the SGD14xE map

Blue and red color indicate alleles of the recurrent and donor parent, respectively, green and yellow color failed and heterozygous scorings. Exp.617 is the recurrent parent 'Express 617', RS239-1 and RS239-2 are two replicates of the same DNA sample of 'RS239' in the SNP analysis.

Marker positions are given for every 20<sup>th</sup> marker.



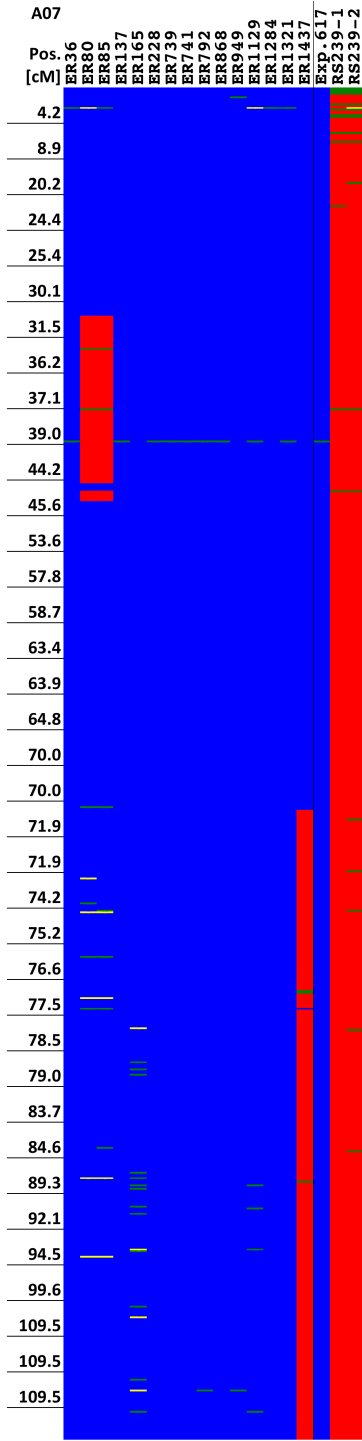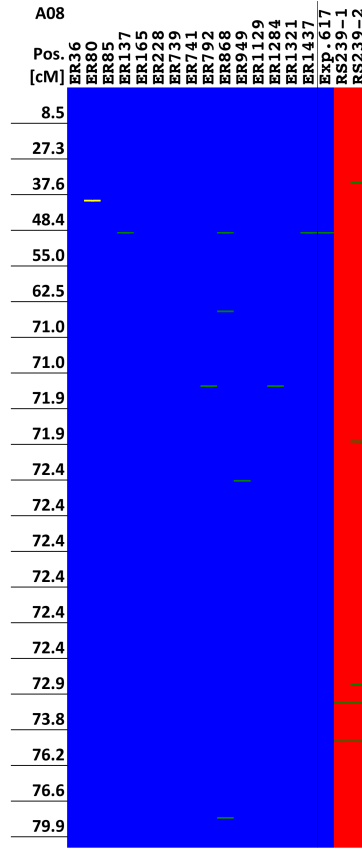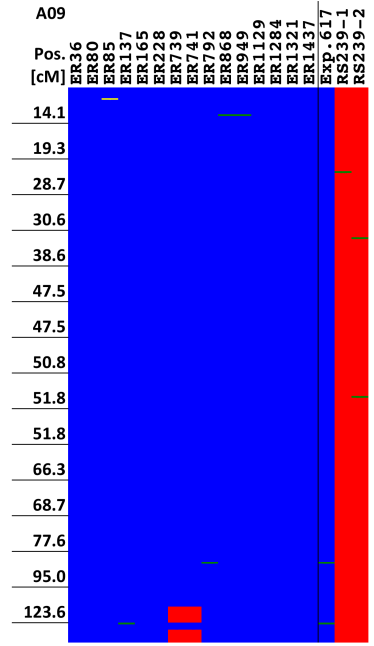



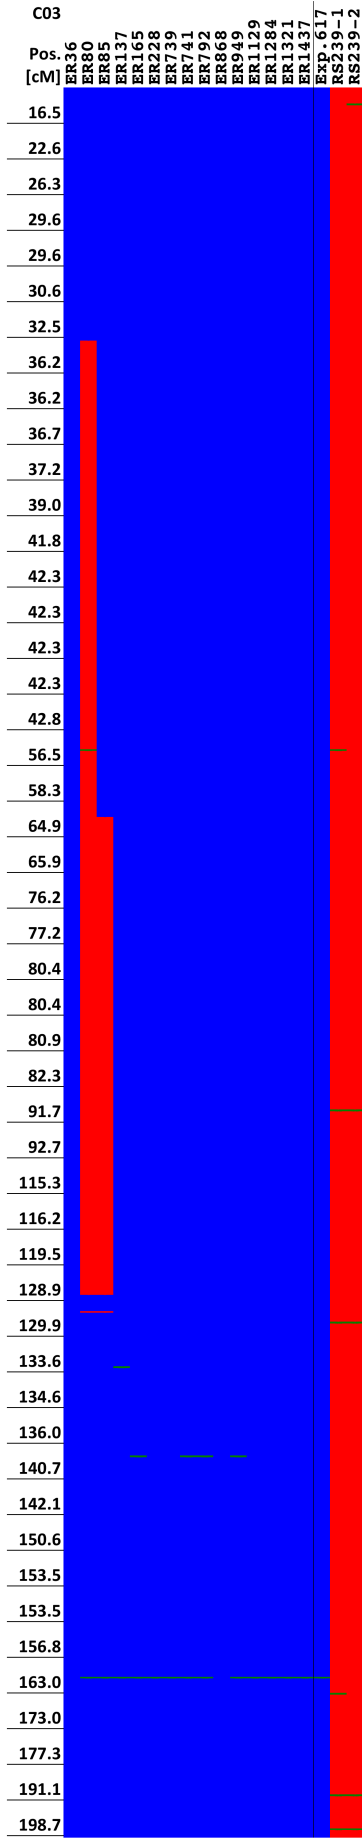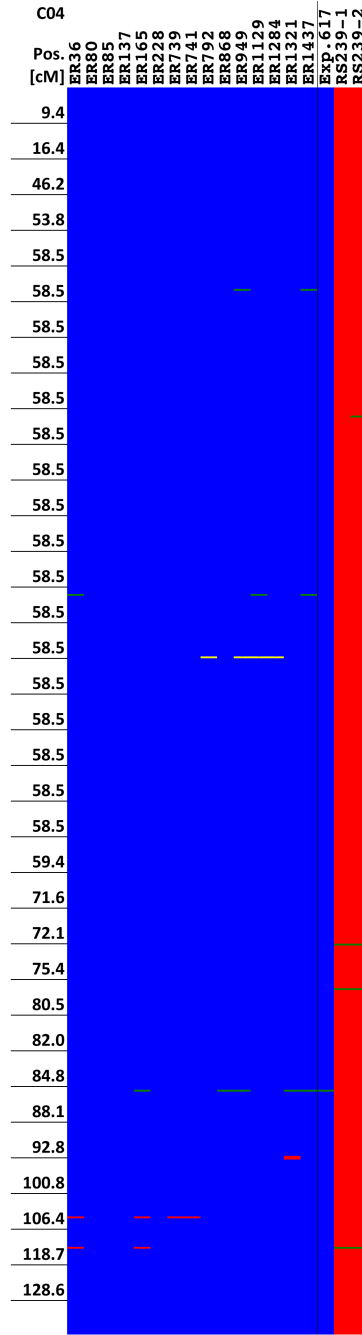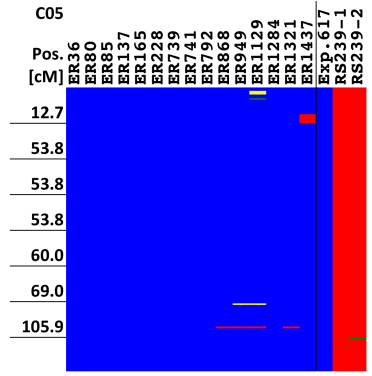

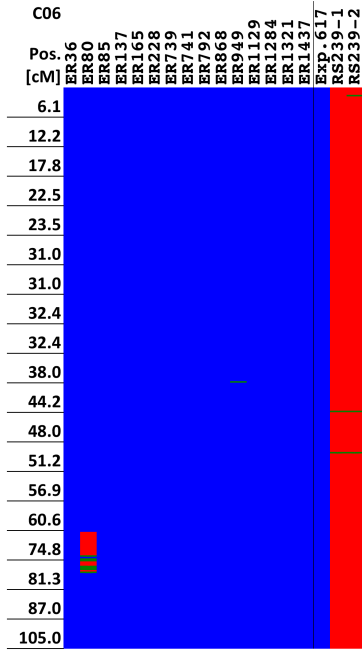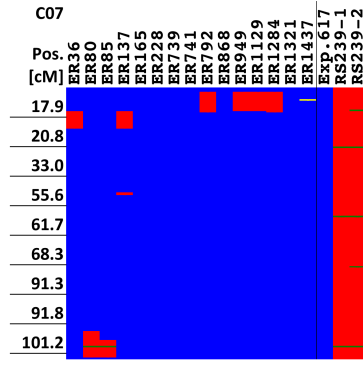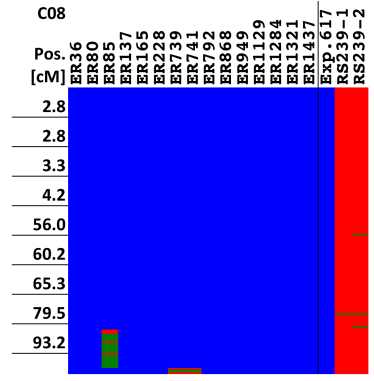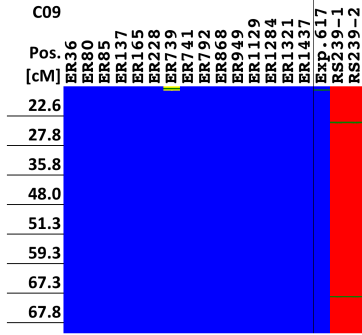

Supplement: 122_2015_2455_MOESM2_ESM.pdf [file 122_2015_2455_MOESM2_ESM.pdf]
